# Supplementary material for: Manisyl-substituted polypyridine coordination compounds: Metallo-supramolecular networks of interdigitated double helices assembled via CH⋯π and π–π interactions
Source: Royal Society of Chemistry journal article supplement (doi:10.1039/b911272c), 2009-12-11
Supplement: b911272c.pdf [file b911272c.pdf]

# Manisyl-substituted polypyridine coordination compounds: Metallo-supramolecular networks of interdigitated double helices assembled via $\pi$ - $\pi$ interactions

Jeremy K. Klosterman, Anthony Linden, Derick K. Frantz and Jay S. Siegel\*

## 5 Supporting Information:

### Section

#### A) NMR Spectroscopy

**Fig. S1** Aromatic region of  $^1\text{H}$  NMR spectra of **1** in  $\text{CDCl}_3$  and  $\text{M}(\text{pherpy})_2\text{-2PF}_6$  complexes **3a**, **7a** – **9a** in  $\text{CD}_3\text{CN}$ .

**Fig. S2** 600 MHz  $^1\text{H}$  NMR spectrum of a  $\text{CD}_3\text{CN}$  solution of **4a**  $\text{Co}(\text{pherpy})_2\text{-2PF}_6$ .

10 **Fig. S3** Manisyl region of the  $^1\text{H}$  NMR spectra of  $\text{M}(\text{pherpy})_2\text{-2PF}_6$  complexes **3a** – **9a** (in  $\text{CD}_3\text{CN}$ ).

**Fig. S4** Aromatic region of  $^1\text{H}$  NMR spectra of **2** in  $\text{CDCl}_3$  and diamagnetic  $\text{M}(\text{terpy})_2\text{-2PF}_6$  complexes **3b**, **7b** – **9b** in  $\text{CD}_3\text{CN}$

**Fig. S5** 600 MHz  $^1\text{H}$  NMR spectrum of a  $\text{CD}_3\text{CN}$  solution of **4b**  $\text{Co}(\text{terpy})_2\text{-2PF}_6$ .

**Fig. S6** Manisyl region of the  $^1\text{H}$  NMR spectra of  $\text{CD}_3\text{CN}$  solutions of  $\text{M}(\text{terpy})_2\text{-2PF}_6$  complexes **3b** – **9b**.

**Table S1** 600 MHz  $^1\text{H}$  NMR chemical shifts of **1** in  $\text{CDCl}_3$  and diamagnetic  $\text{M}(\text{pherpy})_2\text{-2PF}_6$  complexes **3a**, **7a** – **9a**

15 **Table S2** 600 MHz  $^1\text{H}$  NMR chemical shifts of manisyl protons in  $\text{CD}_3\text{CN}$  solutions of  $\text{M}(\text{pherpy})_2\text{-2PF}_6$  complexes **3a** – **9a**

**Table S3** 600 MHz  $^1\text{H}$  NMR chemical shifts of **2** in  $\text{CDCl}_3$  and diamagnetic  $\text{M}(\text{terpy})_2\text{-2PF}_6$  complexes **3b**, **7b** – **9b**

**Table S4** 600 MHz  $^1\text{H}$  NMR chemical shifts of manisyl protons in  $\text{CD}_3\text{CN}$  solutions of  $\text{M}(\text{terpy})_2\text{-2PF}_6$  complexes **3b** – **9b**.

#### B) X-ray Crystallography

20 **Fig. S7** ORTEPs of  $\text{M}(\text{pherpy})_2\text{-PF}_6$  complexes **3a** – **9a**

**Fig. S7** ORTEPs of  $\text{M}(\text{terpy})_2\text{-PF}_6$  complexes **3b** – **9b**

**Fig. S8** Crystal packing of  $\text{Zn}(\text{pherpy})_2\text{-2PF}_6$  **7a**

**Fig. S9** Crystal packing structure of  $\text{Zn}(\text{pherpy})_2\text{-2PF}_6$  **7a**

**Fig. S10** Crystal packing of  $\text{Zn}(\text{terpy})_2\text{-2PF}_6$  **7b**

25 **Fig. S11** Crystal packing structure of  $\text{Zn}(\text{terpy})_2\text{-2PF}_6$  **7b**

**Fig. S12** Crystal packing structure of of Ru-doped  $\text{Zn}(\text{pherpy})_2\text{-2PF}_6$  crystals

**Table S5** Crystallographic data for pyridyl-phenanthroline complexes **3a** – **9a**

**Table S6** Selected bond lengths (Å), atomic distances (Å), and angles (deg) of pyridyl-phenanthroline complexes **3a** – **9a**

**Table S7** Crystallographic data for terpyridine complexes **3b** – **9b**

30 **Table S8** Selected bond lengths (Å), atomic distances (Å), and angles (deg) of terpyridine complexes **3b** – **9b**

**Table S9** Crystallographic data for pyridyl-phenanthroline complexes **7a**, **8a**, and **40:1** mixed crystals

#### C) UV-Vis Spectroscopy

**Fig. S13** Normalized excitation spectra of (a)  $\text{M}(\text{pherpy})_2\text{-2PF}_6$  complexes **3a** – **9b** and (b)  $\text{M}(\text{terpy})_2\text{-2PF}_6$  complexes **3b** – **9b**

35 **Fig. S14** Normalized excitation spectra of  $\text{Os}(\text{pherpy})_2\text{-2PF}_6$  **9a** (-blue-) and  $\text{Os}(\text{terpy})_2\text{-2PF}_6$  **9b** (-red-) in  $\text{CH}_2\text{Cl}_2$

**Table S10** UV-Vis absorption properties of  $\text{M}(\text{pherpy})_2\text{-2PF}_6$  complexes **3a** – **9a**

**Table S11** UV-Vis absorption properties of  $\text{M}(\text{terpy})_2\text{-2PF}_6$  complexes **3b** – **9b**

#### D) Cyclic Voltammetry

40 **Fig S15**. Oxidation voltammetry curves for **3a/b**, **4a/b**, **8a/b** and **9a/b**.

**Fig S16**. Reduction voltammetry curves for **3a/b**, **4a/b**, **8a/b** and **9a/b**.

**Table S12**. Redox voltammetry potentials for **3a/b**, **4a/b**, **8a/b** and **9a/b** in acetonitrile, against  $\text{Ag}^+/\text{AgCl}$  electrode and referenced to ferrocene as 0.5 eV.

A) NMR Spectroscopy

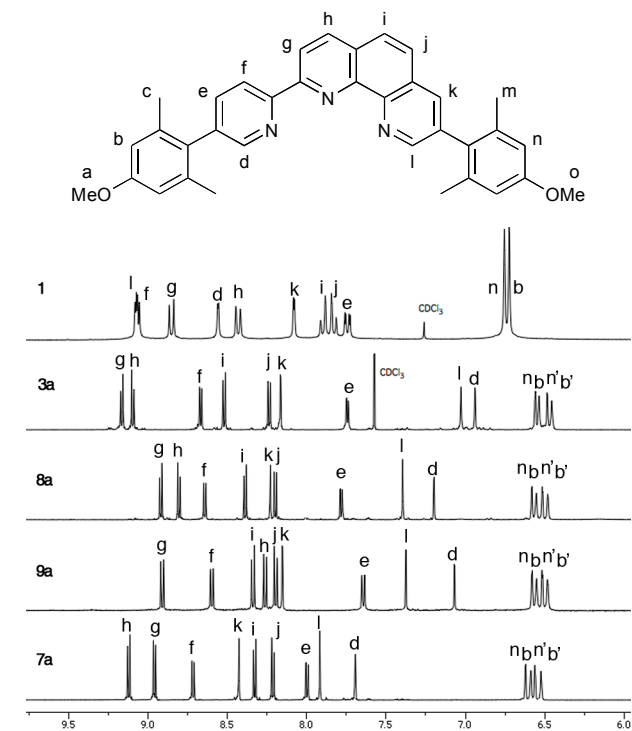

Fig. S1 Aromatic region of <sup>1</sup>H NMR spectra of **1** in CDCl<sub>3</sub> and M(pherpy)<sub>2</sub>-2PF<sub>6</sub> complexes **3a**, **7a** – **9a** in CD<sub>3</sub>CN.

Table S1. 600 MHz <sup>1</sup>H NMR chemical shifts of **1** in CDCl<sub>3</sub> and diamagnetic M(pherpy)<sub>2</sub>-2PF<sub>6</sub> complexes **3a**, **7a** – **9a** in CD<sub>3</sub>CN.

|                       | b/b'       | c/c'       | d    | e    | f    | g    | h    | i    | j    | k    | l    | m/n/n'           |      |
|-----------------------|------------|------------|------|------|------|------|------|------|------|------|------|------------------|------|
| <b>1</b> <sup>a</sup> | 6.73       | 2.10       | 8.56 | 7.74 | 9.06 | 8.86 | 8.43 | 7.90 | 7.83 | 8.08 | 9.07 | 2.08             | 6.76 |
| <b>3a</b>             | 6.54, 6.46 | 1.49, 1.19 | 6.94 | 7.74 | 8.67 | 9.16 | 9.10 | 8.52 | 8.24 | 8.16 | 7.03 | 1.48, 6.56, 6.48 | 6.48 |
| <b>6a</b>             | 6.55, 6.48 | 1.57, 1.33 | 7.20 | 7.78 | 8.64 | 8.92 | 8.80 | 8.39 | 8.20 | 8.23 | 7.40 | 1.57, 6.58, 1.36 | 6.52 |
| <b>7a</b>             | 6.55, 6.48 | 1.58, 1.38 | 7.07 | 7.65 | 8.60 | 8.91 | 8.27 | 8.34 | 8.20 | 8.16 | 7.38 | 1.57, 6.58, 1.36 | 6.51 |
| <b>9a</b>             | 6.59, 6.53 | 1.67, 1.48 | 7.70 | 8.00 | 8.72 | 8.96 | 9.12 | 8.33 | 8.21 | 8.43 | 7.92 | 1.66, 6.62, 1.45 | 6.56 |

<sup>a</sup> In CDCl<sub>3</sub>.

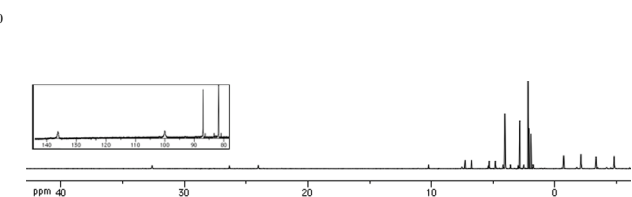

Fig. S2 600 MHz <sup>1</sup>H NMR spectrum of a CD<sub>3</sub>CN solution of **4a** Co(pherpy)<sub>2</sub>-2PF<sub>6</sub>.

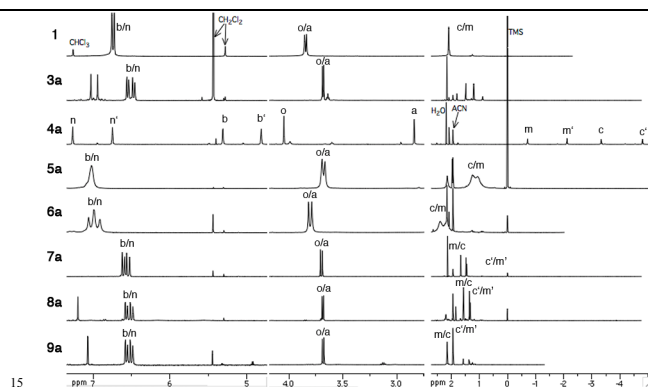

Fig. S3 Manisyl region of the <sup>1</sup>H NMR spectra of M(pherpy)<sub>2</sub>-2PF<sub>6</sub> complexes **3a** – **9a** (in CD<sub>3</sub>CN).

Table S2 600 MHz <sup>1</sup>H NMR chemical shifts of manisyl protons in CD<sub>3</sub>CN solutions of M(pherpy)<sub>2</sub>-2PF<sub>6</sub> complexes **3a** – **9a**

|                       | a           | b/b'       | c/c'        | m/m'        | n/n'       | o    |
|-----------------------|-------------|------------|-------------|-------------|------------|------|
| <b>1</b> <sup>a</sup> | 3.84        | 6.73       | 2.10        | 2.08        | 6.76       | 3.87 |
| <b>3a</b>             | Fe(II) 3.68 | 6.54, 6.46 | 1.49, 1.19  | 1.48, 1.20  | 6.56, 6.48 | 3.69 |
| <b>4a</b>             | Co(II) 2.84 | 5.31, 4.81 | -3.34, 4.81 | -0.71, 2.12 | 7.27, 6.75 | 4.20 |
| <b>5a</b>             | Ni(II) 3.67 | 7.02       | 1.06        | 1.25        | 7.02       | 3.69 |
| <b>6a</b>             | Cu(II) 3.79 | 6.99, 6.91 | 2.01        | 2.39        | 7.06, 6.99 | 3.82 |
| <b>7a</b>             | Zn(II) 3.69 | 6.59, 6.53 | 1.67, 1.48  | 1.66, 1.45  | 6.62, 6.56 | 3.71 |
| <b>8a</b>             | Ru(II) 3.68 | 6.55, 6.48 | 1.57, 1.33  | 1.57, 1.36  | 6.58, 6.52 | 3.69 |
| <b>9a</b>             | Os(II) 3.67 | 6.55, 6.48 | 1.58, 1.38  | 1.57, 1.36  | 6.58, 6.51 | 3.69 |

<sup>a</sup> In CDCl<sub>3</sub>

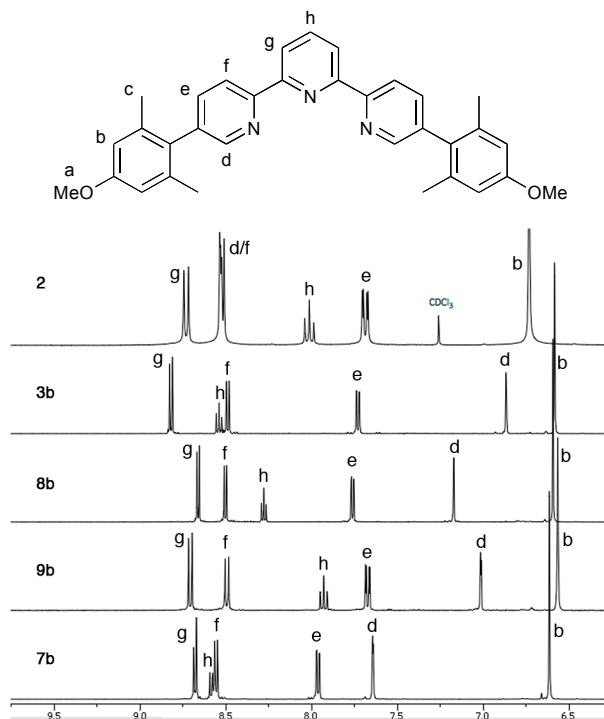

Fig. S4 Aromatic region of <sup>1</sup>H NMR spectra of **2** in CDCl<sub>3</sub> and diamagnetic M(terpy)<sub>2</sub>-2PF<sub>6</sub> complexes **3b**, **7b** – **9b** in CD<sub>3</sub>CN

**Table S3** 600 MHz  $^1\text{H}$  NMR chemical shifts of **2** in  $\text{CDCl}_3$  and diamagnetic  $\text{M}(\text{terpy})_2\text{-2PF}_6$  complexes **3b**, **7b** – **9b** in  $\text{CD}_3\text{CN}$

|                      | a    | b    | c    | d    | e    | f    | g    | h    |
|----------------------|------|------|------|------|------|------|------|------|
| <b>2<sup>a</sup></b> | 3.85 | 6.73 | 2.09 | 8.52 | 7.68 | 8.51 | 8.72 | 8.01 |
| <b>3b</b> Fe(II)     | 3.72 | 6.58 | 1.49 | 6.86 | 7.73 | 8.49 | 8.82 | 8.55 |
| <b>8b</b> Ru(II)     | 3.72 | 6.59 | 1.57 | 7.17 | 7.76 | 8.50 | 8.66 | 8.28 |
| <b>9b</b> Os(II)     | 3.72 | 6.57 | 1.62 | 7.01 | 7.67 | 8.49 | 8.71 | 7.93 |
| <b>7b</b> Zn(II)     | 3.72 | 6.62 | 1.63 | 7.64 | 7.96 | 8.56 | 8.68 | 8.58 |

<sup>a</sup> In  $\text{CDCl}_3$

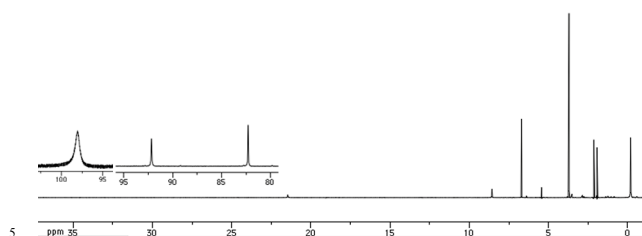

**Fig. S5** 600 MHz  $^1\text{H}$  NMR spectrum of a  $\text{CD}_3\text{CN}$  solution of **4b**  $\text{Co}(\text{terpy})_2\text{-2PF}_6$ .

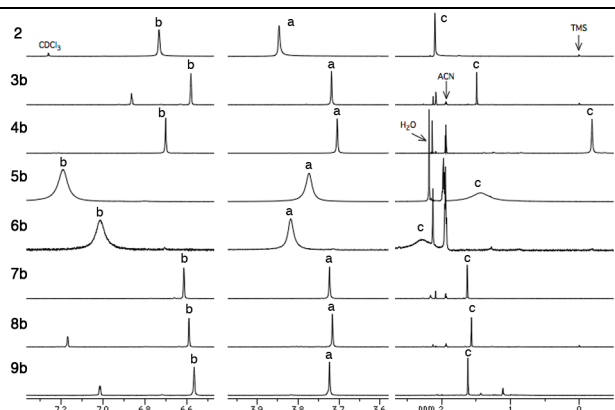

**Fig. S6** Manisyl region of the  $^1\text{H}$  NMR spectra of  $\text{CD}_3\text{CN}$  solutions of  $\text{M}(\text{terpy})_2\text{-2PF}_6$  complexes **3b** – **9b**.

**Table S4** 600 MHz  $^1\text{H}$  NMR chemical shifts of manisyl protons in  $\text{CD}_3\text{CN}$  solutions of  $\text{M}(\text{terpy})_2\text{-2PF}_6$  complexes **3b** – **9b**.

|                      | a    | b    | c     |
|----------------------|------|------|-------|
| <b>2<sup>a</sup></b> | 3.85 | 6.73 | 2.09  |
| <b>3b</b> Fe(II)     | 3.72 | 6.58 | 1.49  |
| <b>4b</b> Co(II)     | 3.71 | 6.7  | -0.18 |
| <b>5b</b> Ni(II)     | 3.74 | 7.14 | 1.42  |
| <b>6b</b> Cu(II)     | 3.81 | 7.01 | 2.27  |
| <b>7b</b> Zn(II)     | 3.72 | 6.62 | 1.63  |
| <b>8b</b> Ru(II)     | 3.72 | 6.59 | 1.57  |
| <b>9b</b> Os(II)     | 3.72 | 6.57 | 1.62  |

<sup>a</sup> In  $\text{CDCl}_3$ .

**B) X-ray Crystallography**

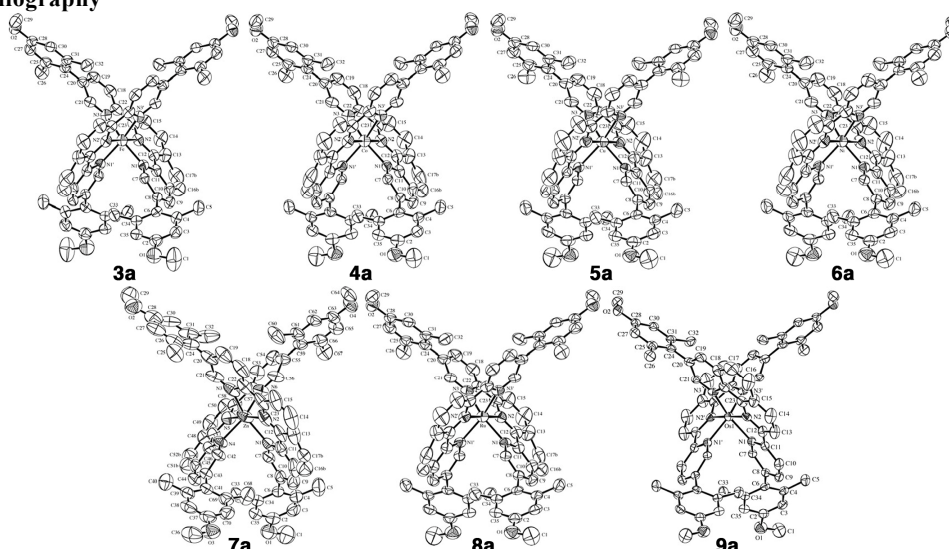

**Fig. S7** ORTEPs of M(pherpy)<sub>2</sub>-PF<sub>6</sub> complexes **3a** – **9a** with hydrogen atoms, counter-ions, and solvent molecules removed for clarity

**Table S5** Crystallographic data for pyridyl-phenanthroline complexes **3a** – **9a**

|                    | <b>3a</b>                                                         | <b>4a</b>                                                         | <b>5a</b>                                                         | <b>6a</b>                                                         | <b>7a</b>                                                         | <b>8a</b>                                                         | <b>9a</b>                                                         |
|--------------------|-------------------------------------------------------------------|-------------------------------------------------------------------|-------------------------------------------------------------------|-------------------------------------------------------------------|-------------------------------------------------------------------|-------------------------------------------------------------------|-------------------------------------------------------------------|
| Formula            | Fe(pherpy) <sub>2</sub><br>•2PF <sub>6</sub> •2CH <sub>3</sub> CN | Co(pherpy) <sub>2</sub><br>•2PF <sub>6</sub> •2CH <sub>3</sub> CN | Ni(pherpy) <sub>2</sub><br>•2PF <sub>6</sub> •2CH <sub>3</sub> CN | Cu(pherpy) <sub>2</sub><br>•2PF <sub>6</sub> •2CH <sub>3</sub> CN | Zn(pherpy) <sub>2</sub><br>•2PF <sub>6</sub> •3CH <sub>3</sub> CN | Ru(pherpy) <sub>2</sub><br>•2PF <sub>6</sub> •2CH <sub>3</sub> CN | Os(pherpy) <sub>2</sub><br>•2PF <sub>6</sub> •2CH <sub>3</sub> CN |
| Formula weight     | 1479.17                                                           | 1482.26                                                           | 1482.03                                                           | 1486.87                                                           | 1529.76                                                           | 1524.33                                                           | 1613.53                                                           |
| Color              | Purple                                                            | Orange-brown                                                      | Yellow                                                            | Lime-green                                                        | Light yellow                                                      | Red                                                               | Purple-brown                                                      |
| Crystal system     | orthorhombic                                                      | orthorhombic                                                      | orthorhombic                                                      | orthorhombic                                                      | monoclinic                                                        | orthorhombic                                                      | orthorhombic                                                      |
| Space group        | <i>Pcca</i>                                                       | <i>Pcca</i>                                                       | <i>Pcca</i>                                                       | <i>Pcca</i>                                                       | <i>P2<sub>1</sub>/c</i>                                           | <i>Pcca</i>                                                       | <i>Pcca</i>                                                       |
| Z                  | 4                                                                 | 4                                                                 | 4                                                                 | 4                                                                 | 4                                                                 | 4                                                                 | 4                                                                 |
| <i>a</i> [Å]       | 25.6038(5)                                                        | 25.3072(4)                                                        | 25.3094(4)                                                        | 24.9866(3)                                                        | 12.9177(1)                                                        | 25.3777(5)                                                        | 25.3861(5)                                                        |
| <i>b</i> [Å]       | 12.2125(2)                                                        | 12.5642(1)                                                        | 12.6402(2)                                                        | 12.9263(2)                                                        | 25.4666(3)                                                        | 12.5601(3)                                                        | 12.5157(3)                                                        |
| <i>c</i> [Å]       | 21.8379(3)                                                        | 21.8238(3)                                                        | 21.9538(3)                                                        | 21.9263(3)                                                        | 22.1526(3)                                                        | 21.8678(4)                                                        | 21.8136(4)                                                        |
| $\alpha$ [°]       | 90                                                                | 90                                                                | 90                                                                | 90                                                                | 90                                                                | 90                                                                | 90                                                                |
| $\beta$ [°]        | 90                                                                | 90                                                                | 90                                                                | 90                                                                | 93.0097(8)                                                        | 90                                                                | 90                                                                |
| $\gamma$ [°]       | 90                                                                | 90                                                                | 90                                                                | 90                                                                | 90                                                                | 90                                                                | 90                                                                |
| V[Å <sup>3</sup> ] | 6828.4(2)                                                         | 6939.2(2)                                                         | 7023.4(2)                                                         | 7081.9(2)                                                         | 7277.5(1)                                                         | 6970.3(3)                                                         | 6930.7(2)                                                         |

**Table S6** Selected bond lengths (Å), atomic distances (Å), and angles (deg) of pyridyl-phenanthroline complexes **3a** – **9a**

|                   | <b>3a</b>   | <b>4a</b>   | <b>5a</b>   | <b>6a</b>   | <b>7a</b>               | <b>8a</b>   | <b>9a</b>   |
|-------------------|-------------|-------------|-------------|-------------|-------------------------|-------------|-------------|
| Metal             | Fe(II)      | Co(II)      | Ni(II)      | Cu(II)      | Zn(II) <sup>a</sup>     | Ru(II)      | Os(II)      |
| Space group       | <i>Pcca</i> | <i>Pcca</i> | <i>Pcca</i> | <i>Pcca</i> | <i>P2<sub>1</sub>/c</i> | <i>Pcca</i> | <i>Pcca</i> |
| M-N(1)            | 2.002(3)    | 2.086(3)    | 2.127(3)    | 2.186(3)    | 2.255(6)/2.196(5)       | 2.084(4)    | 2.088(7)    |
| M-N(2)            | 1.878(3)    | 1.879(3)    | 1.968(3)    | 1.937(3)    | 2.045(6)/2.032(5)       | 1.978(4)    | 1.980(6)    |
| M-N(3)            | 2.012(3)    | 2.105(3)    | 2.135(3)    | 2.198(3)    | 2.206(7)/2.211(5)       | 2.096(4)    | 2.077(7)    |
| N(1)–M–N(3)[°]    | 161.2(1)    | 160.0(1)    | 156.6(1)    | 156.8(1)    | 152.8(2)/152.9(2)       | 157.4(2)    | 157.4(3)    |
| N(1)–N(2)–N(3)[°] | 103.9(1)    | 107.5(1)    | 107.3(1)    | 110.3(1)    | 109.9(3)/109.4(3)       | 105.2(2)    | 104.8(3)    |
| N(1)⋯N(3)         | 3.961(4)    | 4.127(4)    | 4.173(4)    | 4.294(4)    | 4.336(8)/4.285(8)       | 4.099(5)    | 4.08(1)     |
| O(1)⋯O(2)         | 16.811(4)   | 17.074(4)   | 17.091(5)   | 17.247(5)   | 17.446(9)/17.184(8)     | 17.010(7)   | 16.95(1)    |
| O(1)⋯O(1')        | 12.848(5)   | 12.574(5)   | 12.502(5)   | 12.293(5)   | 12.56(1)                | 12.521(7)   | 12.54(1)    |
| O(1)⋯O(2')        | 15.761(4)   | 15.895(4)   | 15.799(5)   | 15.888(5)   | 16.038(8)               | 15.780(7)   | 15.72(1)    |
| O(2)⋯O(1')        | 15.761(4)   | 15.895(4)   | 15.799(5)   | 15.888(5)   | 15.347(9)               | 15.780(7)   | 15.72(1)    |
| O(2)⋯O(2')        | 13.133(4)   | 13.105(4)   | 13.190(4)   | 13.168(4)   | 13.221(8)               | 13.183(6)   | 13.156(9)   |
| N(2)–M–N(2')[°]   | 179.0(2)    | 179.2(2)    | 178.7(2)    | 179.1(2)    | 171.3(3)                | 179.3(2)    | 178.6(4)    |
| ∠ [°]             | 84.1(2)     | 83.6(2)     | 83.5(2)     | 83.0(2)     | 83.9(3)                 | 82.6(2)     | 82.0(4)     |

<sup>a</sup>) The two ligands are non-equivalent

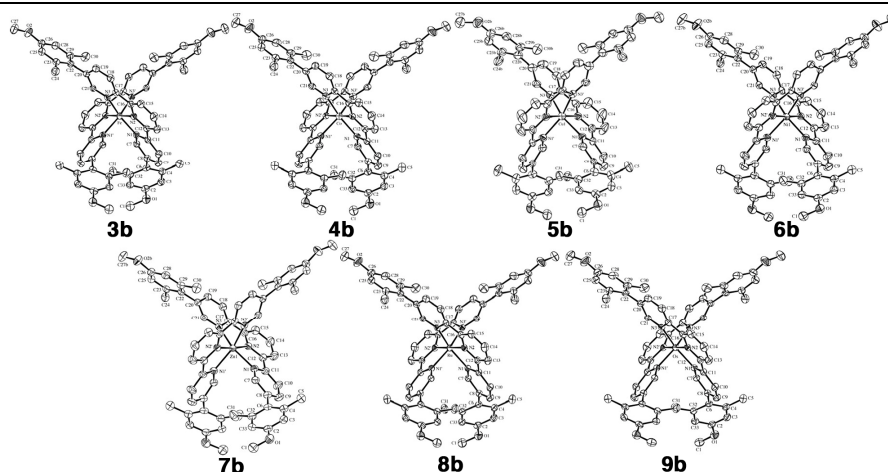

Fig. S7 ORTEPs of  $M(\text{terpy})_2\text{-PF}_6$  complexes **3b** – **9b** with hydrogen atoms, counter-ions, and solvent molecules removed for clarity

Table S7 Crystallographic data for terpyridine complexes **3b** – **9b**

|                       | <b>3b</b>                                                      | <b>4b</b>                                                      | <b>5b</b>                                                      | <b>6b</b>                                                        | <b>7b</b>                                                         | <b>8b</b>                                                      | <b>9b</b>                                                      |
|-----------------------|----------------------------------------------------------------|----------------------------------------------------------------|----------------------------------------------------------------|------------------------------------------------------------------|-------------------------------------------------------------------|----------------------------------------------------------------|----------------------------------------------------------------|
| Formula               | $\text{Fe}(\text{terpy})_2\text{-2PF}_6\text{-6CH}_3\text{CN}$ | $\text{Co}(\text{terpy})_2\text{-2PF}_6\text{-6CH}_3\text{CN}$ | $\text{Ni}(\text{terpy})_2\text{-2PF}_6\text{-3CH}_3\text{CN}$ | $\text{Cu}(\text{terpy})_2\text{-2PF}_6\text{-2.5CH}_3\text{CN}$ | $\text{Zn}(\text{terpy})_2\text{-2PF}_6\text{-2.82CH}_3\text{CN}$ | $\text{Ru}(\text{terpy})_2\text{-2PF}_6\text{-6CH}_3\text{CN}$ | $\text{Os}(\text{terpy})_2\text{-2PF}_6\text{-6CH}_3\text{CN}$ |
| Formula weight        | 1595.33                                                        | 1598.43                                                        | 1475.04                                                        | 1459.35                                                          | 1474.46                                                           | 1640.49                                                        | 1729.69                                                        |
| Color                 | red                                                            | red                                                            | orange                                                         | green                                                            | colorless                                                         | red                                                            | brown                                                          |
| Crystal system        | monoclinic                                                     | monoclinic                                                     | orthorhombic                                                   | orthorhombic                                                     | orthorhombic                                                      | monoclinic                                                     | monoclinic                                                     |
| Space group           | $C2/c$                                                         | $C2/c$                                                         | $Pnna$                                                         | $Pnna$                                                           | $Pnna$                                                            | $C2/c$                                                         | $C2/c$                                                         |
| Z                     | 4                                                              | 4                                                              | 8                                                              | 8                                                                | 8                                                                 | 4                                                              | 4                                                              |
| $a$ [Å]               | 29.749(1)                                                      | 29.5268(4)                                                     | 22.0069(3)                                                     | 22.0072(3)                                                       | 22.0637(2)                                                        | 29.4883(4)                                                     | 29.4529(4)                                                     |
| $b$ [Å]               | 11.4106(4)                                                     | 11.7893(3)                                                     | 25.2020(5)                                                     | 24.9787(4)                                                       | 25.1063(4)                                                        | 11.8087(1)                                                     | 11.8271(1)                                                     |
| $c$ [Å]               | 22.7396(6)                                                     | 22.4187(5)                                                     | 24.8731(3)                                                     | 25.1014(3)                                                       | 25.1199(4)                                                        | 22.4060(3)                                                     | 22.4142(2)                                                     |
| $\alpha$ [°]          | 90                                                             | 90                                                             | 90                                                             | 90                                                               | 90                                                                | 90                                                             | 90                                                             |
| $\beta$ [°]           | 90.062(2)                                                      | 90.847(2)                                                      | 90                                                             | 90                                                               | 90                                                                | 90.9353(6)                                                     | 90.9746(7)                                                     |
| $\gamma$ [°]          | 90                                                             | 90                                                             | 90                                                             | 90                                                               | 90                                                                | 90                                                             | 90                                                             |
| $V$ [Å <sup>3</sup> ] | 7719.1(4)                                                      | 7803.1(3)                                                      | 13795.1(4)                                                     | 13798.5(3)                                                       | 13914.9(3)                                                        | 7801.1(2)                                                      | 7806.7(1)                                                      |

Table S8 Selected bond lengths (Å), atomic distances (Å), and angles (deg) of terpyridine complexes **3b** – **9b**

|                   | <b>3b</b> | <b>4b</b> | <b>5b*</b> |           | <b>6b*</b> |           | <b>7b*</b>          |           | <b>8b</b> | <b>9b</b> |
|-------------------|-----------|-----------|------------|-----------|------------|-----------|---------------------|-----------|-----------|-----------|
| Metal             | Fe(II)    | Co(II)    | Ni(II)     |           | Cu(II)     |           | Zn(II) <sup>a</sup> |           | Ru(II)    | Os(II)    |
| Space group       | $C2/c$    | $C2/c$    | $Pnna$     |           | $Pnna$     |           | $Pnna$              |           | $C2/c$    | $C2/c$    |
| M-N(1)            | 1.975(2)  | 2.063(2)  | 2.122(3)   | 2.107(3)  | 2.177(4)   | 2.161(4)  | 2.186(4)            | 2.159(4)  | 2.060(2)  | 1.984(2)  |
| M-N(2)            | 1.878(2)  | 1.882(2)  | 1.983(3)   | 1.995(3)  | 1.964(4)   | 1.975(4)  | 2.061(4)            | 2.074(4)  | 1.972(2)  | 2.058(2)  |
| M-N(3)            | 1.971(2)  | 2.057(2)  | 2.113(3)   | 2.114(3)  | 2.167(4)   | 2.159(4)  | 2.170(4)            | 2.183(4)  | 2.060(2)  | 2.062(2)  |
| N(1)-M-N(3)[°]    | 162.12(8) | 160.92(9) | 156.3(1)   | 156.3(1)  | 156.2(2)   | 155.8(2)  | 152.3(2)            | 151.7(2)  | 158.73(6) | 157.94(9) |
| N(1)-N(2)-N(3)[°] | 102.2(1)  | 105.7(1)  | 106.4(1)   | 105.8(1)  | 108.9(2)   | 108.4(2)  | 107.7(2)            | 107.5(2)  | 103.63(7) | 103.7(1)  |
| N(1)···N(3)       | 3.899(3)  | 4.063(3)  | 4.146(4)   | 4.131(4)  | 4.251(6)   | 4.223(6)  | 4.230(6)            | 4.210(6)  | 4.049(2)  | 4.044(3)  |
| O(1)···O(2)       | 16.770(3) | 16.952(3) | 17.50(1)   | 17.04(4)  | 17.59(2)   | 16.96(2)  | 17.50(2)            | 16.98(3)  | 16.861(3) | 16.830(3) |
| O(1)···O(1')      | 13.591(3) | 13.465(3) | 13.632(3)  | 12.859(4) | 13.724(6)  | 12.808(6) | 13.766(5)           | 12.928(5) | 13.505(2) | 13.516(3) |
| O(1)···O(2')      | 15.297(3) | 15.405(3) | 15.64(1)   | 15.57(4)  | 15.72(2)   | 15.49(2)  | 15.53(2)            | 15.43(3)  | 15.343(3) | 15.341(3) |
| O(2)···O(2')      | 13.864(3) | 13.769(3) | 12.38(2)   | 13.56(4)  | 12.24(2)   | 13.72(2)  | 12.33(2)            | 13.47(3)  | 13.682(3) | 13.618(4) |
| N(2)-M-N(2')[°]   | 179.8(1)  | 179.4(1)  | 178.7(2)   | 176.9(2)  | 178.6(2)   | 176.2(2)  | 177.9(2)            | 175.1(2)  | 179.34(9) | 179.4(1)  |
| $\Theta$ [°]      | 86.1(1)   | 85.5(1)   | 84.8(2)    | 83.5(2)   | 85.0(2)    | 82.8(2)   | 84.6(2)             | 83.3(2)   | 84.39(9)  | 83.9(1)   |

<sup>a</sup> contains two, symmetry-independent, cations

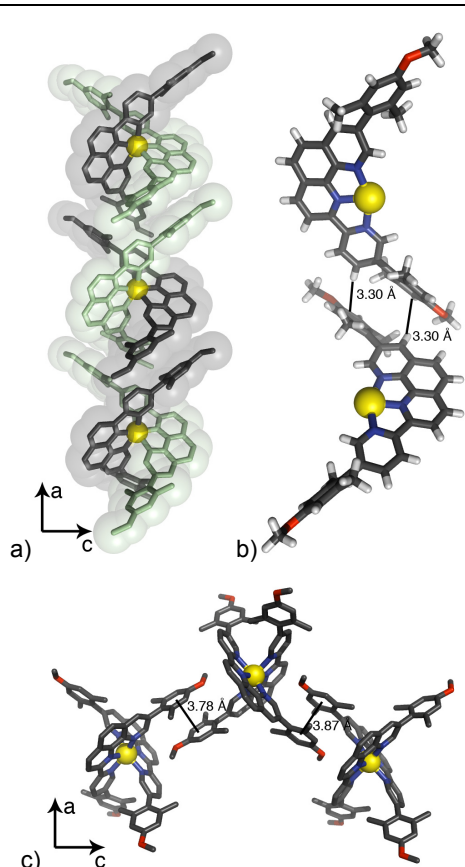

**Fig. S8** Crystal packing of Zn(pherpy)<sub>2</sub>-2PF<sub>6</sub> **7a** highlighting a) the stacking of dicationic units to form a right-handed double helix, b) the intra-molecular C-H...π interactions between adjacent ligands within a single strand of the double helix and c) intra-strand π-stacking perpendicular to the helical axis.

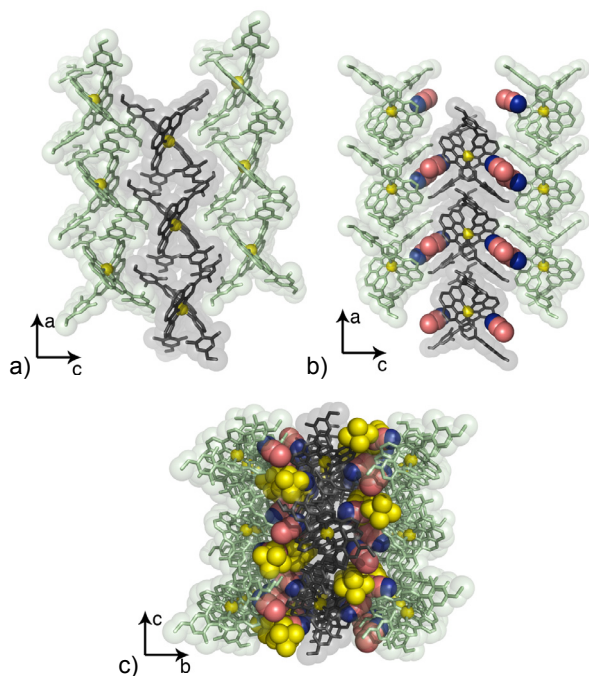

**Fig. S9** Crystal packing structure of Zn(pherpy)<sub>2</sub>-2PF<sub>6</sub> **7a** showing a) the 2D sheet of alternating double-helices along the b axis, b) the side view of the sheets along the c axis, and c) the top view of the sheets along the a axis

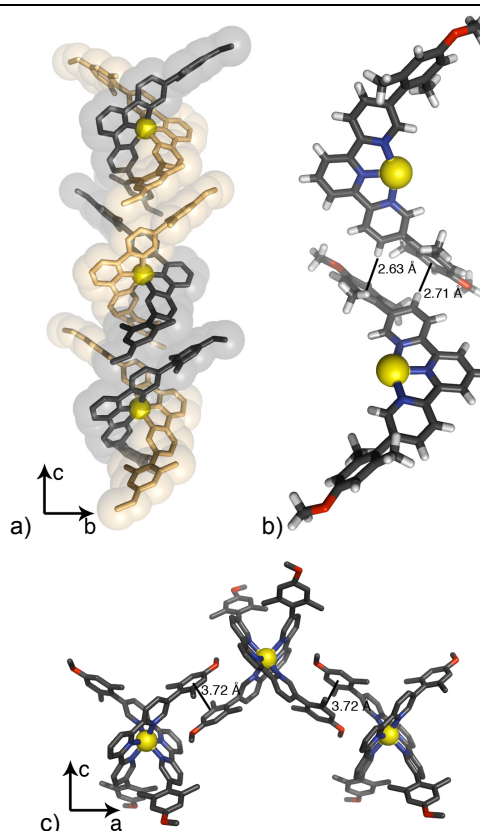

**Fig. S10** Crystal packing of Zn(terpy)<sub>2</sub>-2PF<sub>6</sub> **7b** showing a) the stacking of dicationic units to form a right-handed double helix, b) the intra-molecular C-H...π interactions between adjacent ligands within a single strand of the double helix and c) intra-strand π-stacking perpendicular to the helical axis.

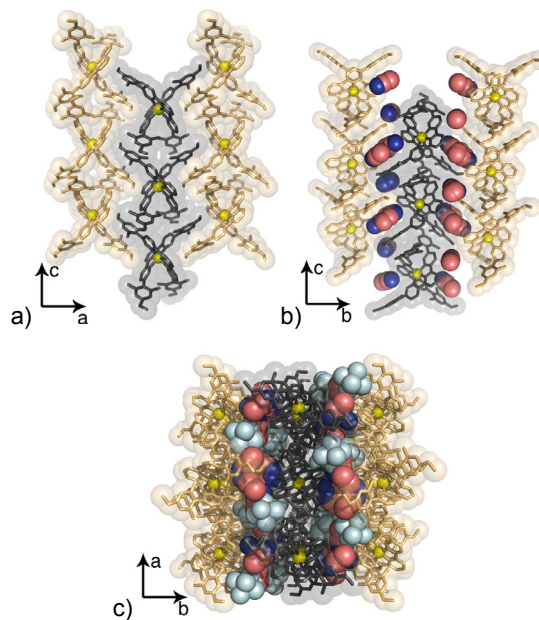

**Fig. S11** Crystal packing structure of Zn(terpy)<sub>2</sub>-2PF<sub>6</sub> **7b** highlighting a) the 2D sheet of alternating double-helices along the b axis, b) the side view of the sheets along the a axis, and c) the top view of the sheets along the c axis

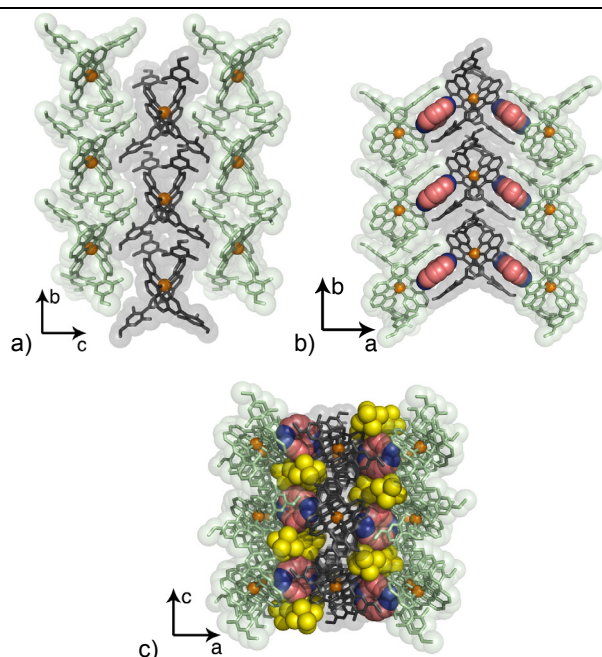

**Fig. S12** Crystal packing structure of of Ru-doped Zn(pherpy)<sub>2</sub>-2PF<sub>6</sub> crystals showing a) the 2D sheet of alternating double-helices along the b axis, b) the top view of the sheets along the a axis and c) the side view of the sheets along the b axis.

**Table S9** Crystallographic data for pyridyl-phenanthroline complexes **7a**, **8a**, and the **40:1** mixed crystal

| Formula            | Zn(pherpy) <sub>2</sub> -<br>2PF <sub>6</sub> -3CH <sub>3</sub> CN | Ru(pherpy) <sub>2</sub> -<br>2PF <sub>6</sub> -2CH <sub>3</sub> CN | Zn(pherpy) <sub>2</sub> -<br>2PF <sub>6</sub> -2CH <sub>3</sub> CN |
|--------------------|--------------------------------------------------------------------|--------------------------------------------------------------------|--------------------------------------------------------------------|
| Formula weight     | 1529.76                                                            | 1524.33                                                            | 1488.71                                                            |
| Color              | Light yellow                                                       | Red                                                                | Red-orange                                                         |
| Crystal system     | monoclinic                                                         | orthorhombic                                                       | orthorhombic                                                       |
| Space group        | <i>P2<sub>1</sub>/c</i>                                            | <i>Pcca</i>                                                        | <i>Pcca</i>                                                        |
| Z                  | 4                                                                  | 4                                                                  | 4                                                                  |
| a [Å]              | 12.9177(1)                                                         | 25.3777(5)                                                         | 24.974(1)                                                          |
| b [Å]              | 25.4666(3)                                                         | 12.5601(3)                                                         | 12.912(1)                                                          |
| c [Å]              | 22.1526(3)                                                         | 21.8678(4)                                                         | 22.066(1)                                                          |
| α [°]              | 90                                                                 | 90                                                                 | 90                                                                 |
| β [°]              | 93.0097(8)                                                         | 90                                                                 | 90                                                                 |
| γ [°]              | 90                                                                 | 90                                                                 | 90                                                                 |
| V[Å <sup>3</sup> ] | 7277.5(1)                                                          | 6970.3(3)                                                          | 7115.5(7)                                                          |

C) UV-Vis Spectroscopy

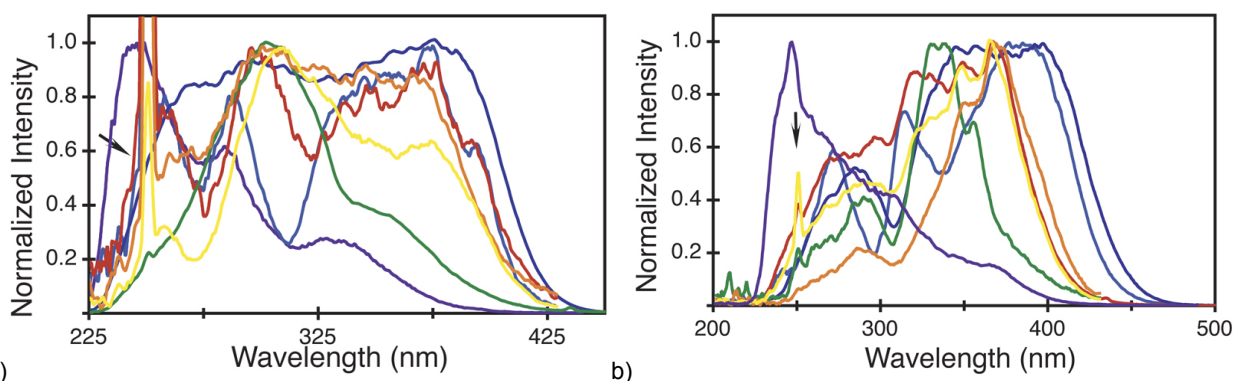

**Fig. S13** Normalized excitation spectra of (a) M(pherpy)<sub>2</sub>-2PF<sub>6</sub> complexes **3a–9a** and (b) M(terpy)<sub>2</sub>-2PF<sub>6</sub> complexes **3b–9b** in CH<sub>2</sub>Cl<sub>2</sub>: Fe(L)<sub>2</sub>-2PF<sub>6</sub> (-red-), Co(L)<sub>2</sub>-2PF<sub>6</sub> (-orange-), Ni(L)<sub>2</sub>-2PF<sub>6</sub> (-yellow-), Cu(L)<sub>2</sub>-2PF<sub>6</sub> (-green-), Zn(L)<sub>2</sub>-2PF<sub>6</sub> (-blue-), Ru(L)<sub>2</sub>-2PF<sub>6</sub> (-indigo-), Os(L)<sub>2</sub>-2PF<sub>6</sub> (-violet-).

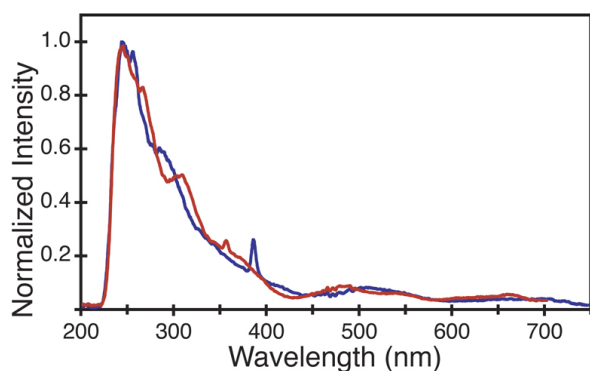

**Fig. S14** Normalized excitation spectra of Os(pherpy)<sub>2</sub>-2PF<sub>6</sub> **9a** (-blue-) and Os(terpy)<sub>2</sub>-2PF<sub>6</sub> **9b** (-red-) in CH<sub>2</sub>Cl<sub>2</sub>

**Table S11** UV-Vis absorption properties of M(terpy)<sub>2</sub>-2PF<sub>6</sub> complexes **3b–9b** in methylene chloride

|           | $\lambda_{\max}$ (nm) | $\epsilon_{\max}$ | $\lambda_{\max\text{MLCT}}$ (nm) | $\epsilon_{\max\text{MLCT}}$ |
|-----------|-----------------------|-------------------|----------------------------------|------------------------------|
| <b>2</b>  | 287*, 305             | 27800             |                                  |                              |
| <b>3b</b> | 275*, 319, 351        | 59000             | 495sh, 555, 610sh                | 10000                        |
| <b>4b</b> | 274*, 313, 335sh      | 52000             | 503, 553                         | 1000                         |
| <b>5b</b> | 271*, 345             | 75000             |                                  |                              |
| <b>6b</b> | 285sh*, 326           | 45000             |                                  |                              |
| <b>7b</b> | 279*, 287, 341        | 34000             |                                  |                              |
| <b>8b</b> | 269, 311*, 360sh      | 69000             | 479                              | 12000                        |
| <b>9b</b> | 315*, 356sh           | 69,600            | 485*, 537sh, 665, 694sh          | 11100                        |

\*denotes  $\lambda_{\max}$  and  $\epsilon_{\max}$  is given

**Table S10** UV-Vis absorption properties of M(pherpy)<sub>2</sub>-2PF<sub>6</sub> complexes **3a–9a** in methylene chloride

|           | $\lambda_{\max}$ (nm) | $\epsilon_{\max}$ | $\lambda_{\max\text{MLCT}}$ (nm) | $\epsilon_{\max\text{MLCT}}$ |
|-----------|-----------------------|-------------------|----------------------------------|------------------------------|
| <b>1</b>  | 298*, 355             | 42100             |                                  |                              |
| <b>3a</b> | 305*, 367             | 57000             | 486, 579*                        | 8000                         |
| <b>4a</b> | 305*, 360sh           | 47000             |                                  |                              |
| <b>5a</b> | 307*, 351, 371        | 51000             |                                  |                              |
| <b>6a</b> | 306*, 354, 370        | 56000             |                                  |                              |
| <b>7a</b> | 308*, 351, 369        | 54000             |                                  |                              |
| <b>8a</b> | 298*, 333, 365sh      | 72000             | 469, 485, 500*                   | 10000                        |
| <b>9a</b> | 299*, 337sh           | 57800             | 505*, 690                        | 9300                         |

\*denotes  $\lambda_{\max}$  and  $\epsilon_{\max}$  is given



D) Cyclic Voltammetry

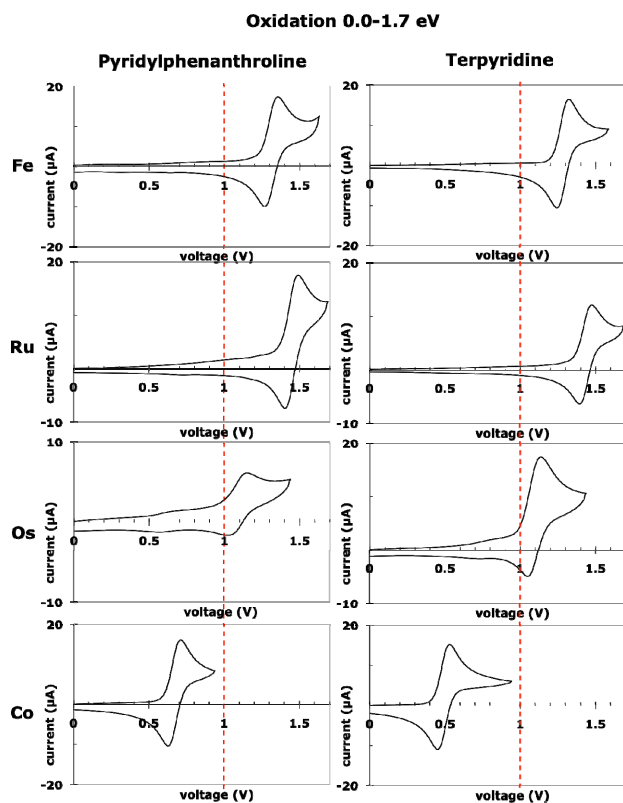

Fig S15. Oxidation voltammetry curves for 3a/b, 8a/b, 9a/b and 4a/b.

<sup>10</sup> Table S12. Redox voltammetry potentials for 3a/b, 4a/b, 8a/b and 9a/b in acetonitrile, against Ag<sup>+</sup>/AgCl electrode and referenced to ferrocene as 0.5 eV.

|    | Oxidation | Reduction1 | Reduction 2 | Reduction3 |
|----|-----------|------------|-------------|------------|
| 3a | 1.31      | -0.93(s)   | -1.06(s)    |            |
| 3b | 1.28      | -1.11      | -1.29       |            |
| 4a | 0.67      | -0.57      | -1.32       | -1.71      |
| 4b | 0.49      | -0.64      | -1.54       | -1.92      |
| 8a | 1.45      | -0.98      | -1.20       | -1.69      |
| 8b | 1.43      | -1.13      | -1.40       |            |
| 9a | 1.09      | -0.95      | -1.21       |            |
| 9b | 1.09      | -1.09      | -1.40       |            |

\*denotes  $\lambda_{\max}$  and  $\epsilon_{\max}$  is given

15

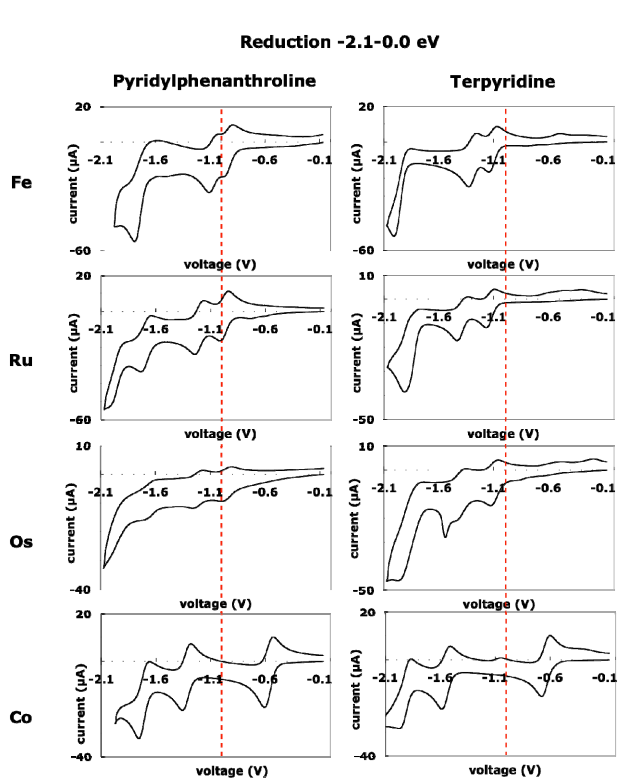

Fig S16. Reduction voltammetry curves for 3a/b, 8a/b, 9a/b and 4a/b.
